# Supplementary material
Source: ML conference proceedings conference paper supplement (https://openreview.net/forum?id=sX9HbELwLO)
Supplement: supplementary_material [file Model Utility_continual_unlearning.pdf › Right-to-be-forgotten/figure/Model Utility_continual_unlearning.pdf]

Model Utility

Continual forget01

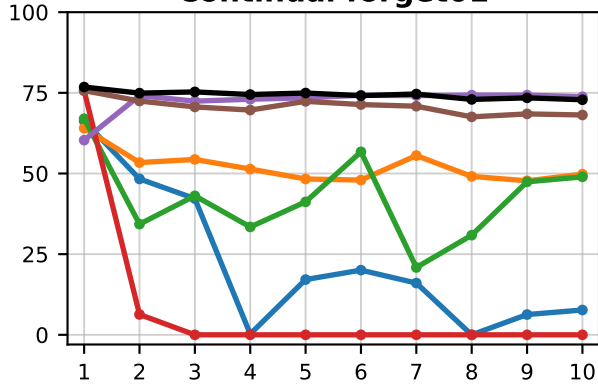

Continual forget05

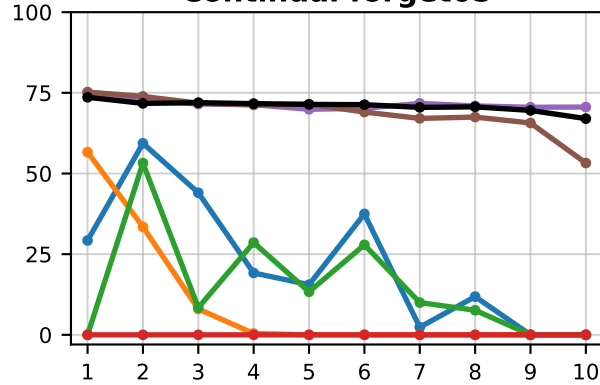

Continual forget10

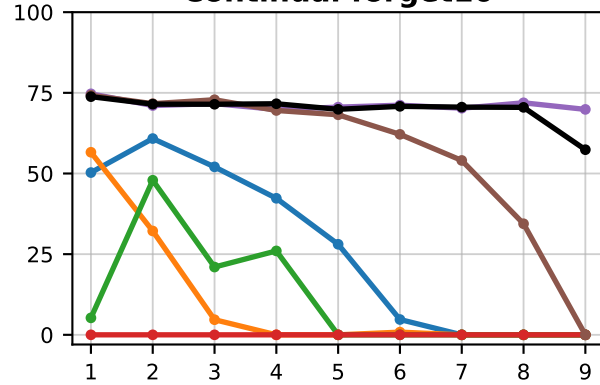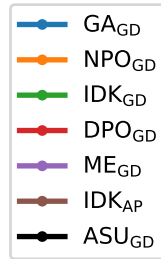

Continual Unlearning Steps
