# Supplementary material
Source: ML conference proceedings conference paper supplement (https://openreview.net/forum?id=sX9HbELwLO)

Continual forget01

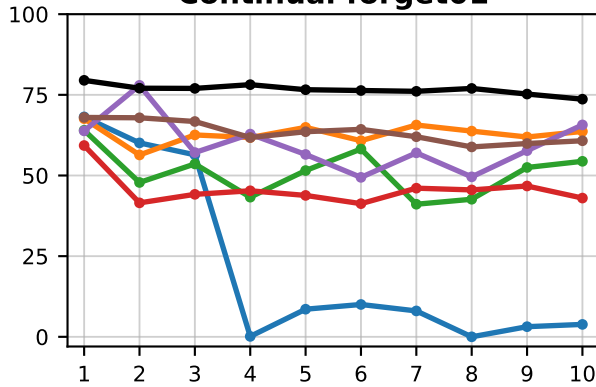

Continual forget05

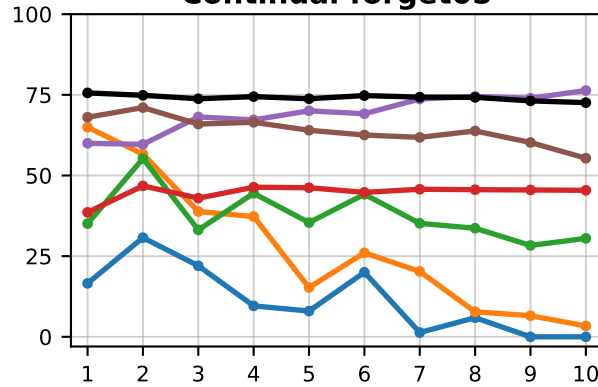

Continual forget10

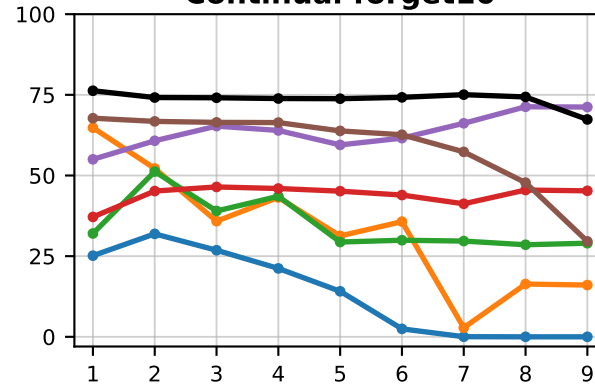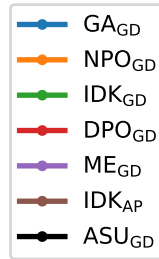

Unlearning Tasks

Supplement: supplementary_material [file Average._continual_unlearning.pdf › Right-to-be-forgotten/figure/Average._continual_unlearning.pdf]

**Continual forget01**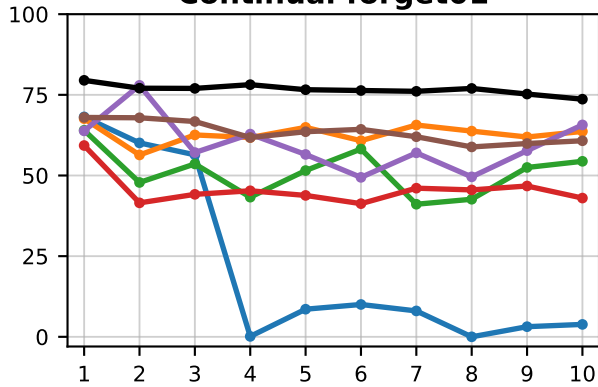**Continual forget05**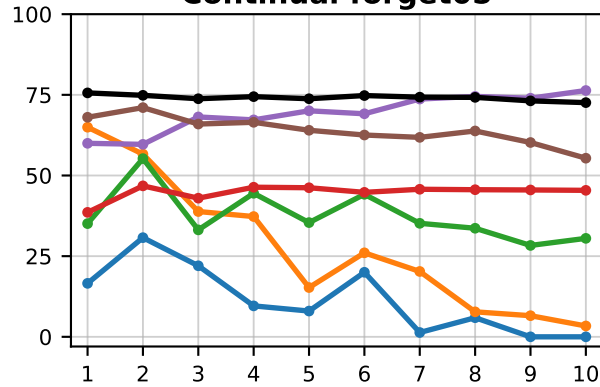**Continual forget10**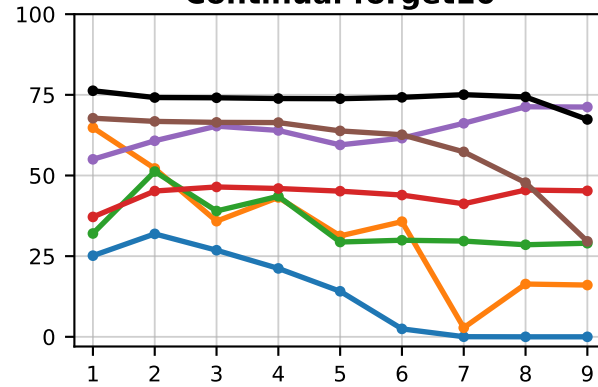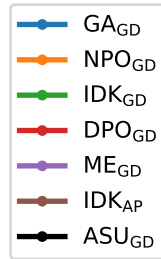

Supplement: supplementary_material [file Average_continual_unlearning.pdf › Right-to-be-forgotten/figure/Average_continual_unlearning.pdf]

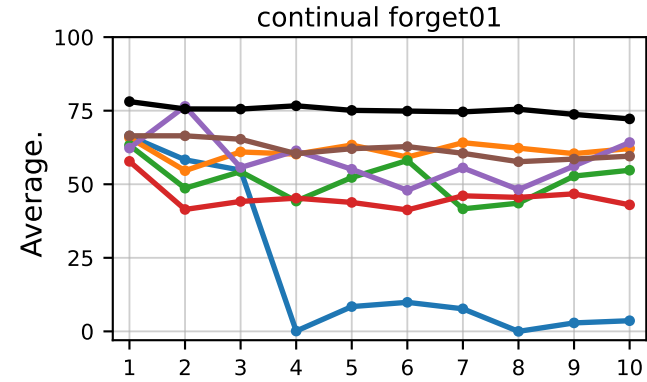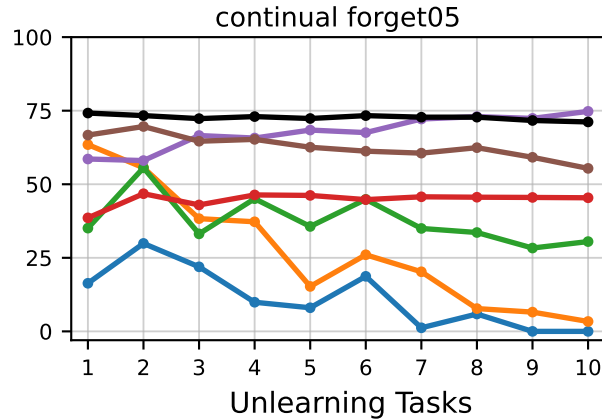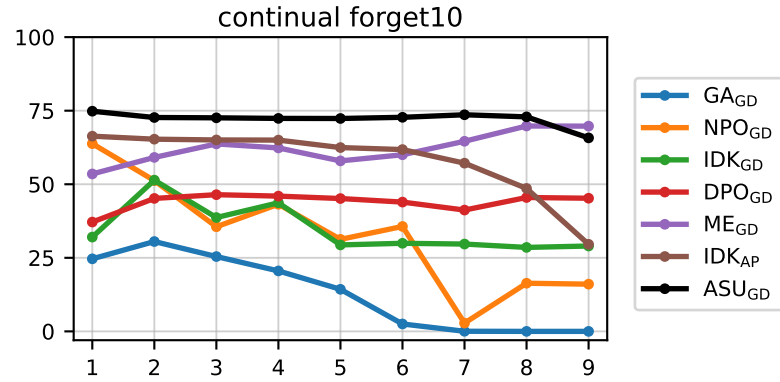

Supplement: supplementary_material [file continual_unlearning.pdf › Right-to-be-forgotten/figure/continual_unlearning.pdf]
